# Supplementary material
Source: ML conference proceedings conference paper supplement (https://proceedings.mlr.press/v80/liao18b.html)
Supplement: Supplementary file [file liao18b-supp.pdf]

## Supplementary Material

### The Dynamics of Learning: A Random Matrix Approach

#### A. Proofs

##### A.1. Proofs of Theorem 1 and 2

*Proof.* We start with the proof of Theorem 1, since

$$\begin{aligned}\boldsymbol{\mu}^\top \mathbf{w}(t) &= \boldsymbol{\mu}^\top e^{-\frac{\alpha t}{n} \mathbf{X} \mathbf{X}^\top} \mathbf{w}_0 + \boldsymbol{\mu}^\top \left( \mathbf{I}_p - e^{-\frac{\alpha t}{n} \mathbf{X} \mathbf{X}^\top} \right) \mathbf{w}_{LS} \\ &= -\frac{1}{2\pi i} \oint_\gamma f_t(z) \boldsymbol{\mu}^\top \left( \frac{1}{n} \mathbf{X} \mathbf{X}^\top - z \mathbf{I}_p \right)^{-1} \mathbf{w}_0 dz - \frac{1}{2\pi i} \oint_\gamma \frac{1 - f_t(z)}{z} \boldsymbol{\mu}^\top \left( \frac{1}{n} \mathbf{X} \mathbf{X}^\top - z \mathbf{I}_p \right)^{-1} \frac{1}{n} \mathbf{X} \mathbf{y} dz\end{aligned}$$

with  $\frac{1}{n} \mathbf{X} \mathbf{X}^\top = \frac{1}{n} \mathbf{Z} \mathbf{Z}^\top + \begin{bmatrix} \boldsymbol{\mu} & \frac{1}{n} \mathbf{Z} \mathbf{y} \\ 1 & 0 \end{bmatrix} \begin{bmatrix} \boldsymbol{\mu}^\top \\ \frac{1}{n} \mathbf{y}^\top \mathbf{Z}^\top \end{bmatrix}$  and therefore

$$\left( \frac{1}{n} \mathbf{X} \mathbf{X}^\top - z \mathbf{I}_p \right)^{-1} = \mathbf{Q}(z) - \mathbf{Q}(z) \begin{bmatrix} \boldsymbol{\mu} & \frac{1}{n} \mathbf{Z} \mathbf{y} \\ 1 & 0 \end{bmatrix} \begin{bmatrix} \boldsymbol{\mu}^\top \mathbf{Q}(z) \boldsymbol{\mu} & 1 + \frac{1}{n} \boldsymbol{\mu}^\top \mathbf{Q}(z) \mathbf{Z} \mathbf{y} \\ 1 + \frac{1}{n} \boldsymbol{\mu}^\top \mathbf{Q}(z) \mathbf{Z} \mathbf{y} & -1 + \frac{1}{n} \mathbf{y}^\top \mathbf{Z}^\top \mathbf{Q}(z) \frac{1}{n} \mathbf{Z} \mathbf{y} \end{bmatrix}^{-1} \begin{bmatrix} \boldsymbol{\mu}^\top \\ \frac{1}{n} \mathbf{y}^\top \mathbf{Z}^\top \end{bmatrix} \mathbf{Q}(z).$$

We thus resort to the computation of the bilinear form  $\mathbf{a}^\top \mathbf{Q}(z) \mathbf{b}$ , for which we plug-in the deterministic equivalent of  $\mathbf{Q}(z) \leftrightarrow \tilde{\mathbf{Q}}(z) = m(z) \mathbf{I}_p$  to obtain the following estimations

$$\begin{aligned}\boldsymbol{\mu}^\top \mathbf{Q}(z) \boldsymbol{\mu} &= \|\boldsymbol{\mu}\|^2 m(z) \\ \frac{1}{n} \boldsymbol{\mu}^\top \mathbf{Q}(z) \mathbf{Z} \mathbf{y} &= o(1) \\ \frac{1}{n^2} \mathbf{y}^\top \mathbf{Z}^\top \mathbf{Q}(z) \mathbf{Z} \mathbf{y} &= \frac{1}{n^2} \mathbf{y}^\top \tilde{\mathbf{Q}}(z) \mathbf{Z}^\top \mathbf{Z} \mathbf{y} = \frac{1}{n} \mathbf{y}^\top \tilde{\mathbf{Q}}(z) \left( \frac{1}{n} \mathbf{Z}^\top \mathbf{Z} - z \mathbf{I}_n + z \mathbf{I}_n \right) \mathbf{y} \\ &= \frac{1}{n} \|\mathbf{y}\|^2 + z \frac{1}{n} \mathbf{y}^\top \tilde{\mathbf{Q}}(z) \mathbf{y} = 1 + z \frac{1}{n} \text{tr} \tilde{\mathbf{Q}}(z) = 1 + z \tilde{m}(z)\end{aligned}$$

with the *co-resolvent*  $\tilde{\mathbf{Q}}(z) = \left( \frac{1}{n} \mathbf{Z}^\top \mathbf{Z} - z \mathbf{I}_n \right)^{-1}$ ,  $m(z)$  the *unique* solution of the Marčenko–Pastur equation (2) and  $\tilde{m}(z) = \frac{1}{n} \text{tr} \tilde{\mathbf{Q}}(z) + o(1)$  such that

$$cm(z) = \tilde{m}(z) + \frac{1}{z}(1 - c)$$

which is a direct result of the fact that both  $\mathbf{Z}^\top \mathbf{Z}$  and  $\mathbf{Z} \mathbf{Z}^\top$  have the same eigenvalues except for the additional zeros eigenvalues for the larger matrix (which essentially depends on the sign of  $1 - c$ ).

We thus get, with the Schur complement lemma,

$$\begin{aligned}\left( \frac{1}{n} \mathbf{X} \mathbf{X}^\top - z \mathbf{I}_p \right)^{-1} &= \mathbf{Q}(z) - \mathbf{Q}(z) \begin{bmatrix} \boldsymbol{\mu} & \frac{1}{n} \mathbf{Z} \mathbf{y} \\ 1 & 0 \end{bmatrix} \begin{bmatrix} \|\boldsymbol{\mu}\|^2 m(z) & 1 \\ 1 & z \tilde{m}(z) \end{bmatrix}^{-1} \begin{bmatrix} \boldsymbol{\mu}^\top \\ \frac{1}{n} \mathbf{y}^\top \mathbf{Z}^\top \end{bmatrix} \mathbf{Q}(z) + o(1) \\ &= \mathbf{Q}(z) - \frac{\mathbf{Q}(z)}{z \|\boldsymbol{\mu}\|^2 m(z) \tilde{m}(z) - 1} \begin{bmatrix} \boldsymbol{\mu} & \frac{1}{n} \mathbf{Z} \mathbf{y} \\ 1 & 0 \end{bmatrix} \begin{bmatrix} z \tilde{m}(z) & -1 \\ -1 & \|\boldsymbol{\mu}\|^2 m(z) \end{bmatrix} \begin{bmatrix} \boldsymbol{\mu}^\top \\ \frac{1}{n} \mathbf{y}^\top \mathbf{Z}^\top \end{bmatrix} \mathbf{Q}(z) + o(1)\end{aligned}$$

and the term  $\boldsymbol{\mu}^\top \left( \frac{1}{n} \mathbf{X} \mathbf{X}^\top - z \mathbf{I}_p \right)^{-1} \frac{1}{n} \mathbf{X} \mathbf{y}$  is therefore given by

$$\begin{aligned}\boldsymbol{\mu}^\top \left( \frac{1}{n} \mathbf{X} \mathbf{X}^\top - z \mathbf{I}_p \right)^{-1} \frac{1}{n} \mathbf{X} \mathbf{y} &= \|\boldsymbol{\mu}\|^2 m(z) - \frac{\left[ \|\boldsymbol{\mu}\|^2 m(z) \quad 0 \right]}{z \|\boldsymbol{\mu}\|^2 m(z) \tilde{m}(z) - 1} \begin{bmatrix} z \tilde{m}(z) & -1 \\ -1 & \|\boldsymbol{\mu}\|^2 m(z) \end{bmatrix} \begin{bmatrix} \|\boldsymbol{\mu}\|^2 m(z) \\ 1 + z \tilde{m}(z) \end{bmatrix} + o(1) \\ &= \frac{\|\boldsymbol{\mu}\|^2 m(z) z \tilde{m}(z)}{\|\boldsymbol{\mu}\|^2 m(z) z \tilde{m}(z) - 1} + o(1) = \frac{\|\boldsymbol{\mu}\|^2 (zm(z) + 1)}{1 + \|\boldsymbol{\mu}\|^2 (zm(z) + 1)} + o(1) = \frac{\|\boldsymbol{\mu}\|^2 m(z)}{(\|\boldsymbol{\mu}\|^2 + c)m(z) + 1} + o(1)\end{aligned}$$

where we use the fact that  $\tilde{m}(z) = cm(z) - \frac{1}{z}(1-c)$  and  $(zm(z) + 1)(cm(z) + 1) = m$  from (2), while the term  $\boldsymbol{\mu}^\top \left(\frac{1}{n}\mathbf{X}\mathbf{X}^\top - z\mathbf{I}_p\right)^{-1} \mathbf{w}_0 = O(n^{-\frac{1}{2}})$  due to the independence of  $\mathbf{w}_0$  with respect to  $\mathbf{Z}$  and can be check with a careful application of Lyapunov's central limit theorem (Billingsley, 2008).

Following the same arguments we have

$$\begin{aligned} \mathbf{w}(t)^\top \mathbf{w}(t) &= -\frac{1}{2\pi i} \oint_{\gamma} f_t^2(z) \mathbf{w}_0 \left(\frac{1}{n}\mathbf{X}\mathbf{X}^\top - z\mathbf{I}_p\right)^{-1} \mathbf{w}_0 dz - \frac{1}{\pi i} \oint_{\gamma} \frac{f_t(z)(1-f_t(z))}{z} \mathbf{w}_0 \left(\frac{1}{n}\mathbf{X}\mathbf{X}^\top - z\mathbf{I}_p\right)^{-1} \frac{1}{n}\mathbf{X}\mathbf{y} dz \\ &\quad - \frac{1}{2\pi i} \oint_{\gamma} \frac{(1-f_t(z))^2}{z^2} \frac{1}{n}\mathbf{y}^\top \mathbf{X}^\top \left(\frac{1}{n}\mathbf{X}\mathbf{X}^\top - z\mathbf{I}_p\right)^{-1} \frac{1}{n}\mathbf{X}\mathbf{y} dz \end{aligned}$$

together with

$$\begin{aligned} \mathbf{w}_0 \left(\frac{1}{n}\mathbf{X}\mathbf{X}^\top - z\mathbf{I}_p\right)^{-1} \mathbf{w}_0 &= \sigma^2 m(z) + o(1) \\ \mathbf{w}_0 \left(\frac{1}{n}\mathbf{X}\mathbf{X}^\top - z\mathbf{I}_p\right)^{-1} \frac{1}{n}\mathbf{X}\mathbf{y}^\top &= o(1) \\ \frac{1}{n}\mathbf{y}^\top \mathbf{X}^\top \left(\frac{1}{n}\mathbf{X}\mathbf{X}^\top - z\mathbf{I}_p\right)^{-1} \frac{1}{n}\mathbf{X}\mathbf{y} &= 1 - \frac{1}{(\|\boldsymbol{\mu}\|^2 + c)m(z) + 1} + o(1). \end{aligned}$$

It now remains to replace the different terms in  $\boldsymbol{\mu}^\top \mathbf{w}(t)$  and  $\mathbf{w}(t)^\top \mathbf{w}(t)$  by their asymptotic approximations. To this end, first note that all aforementioned approximations can be summarized as the fact that, for a generic  $h(z)$ , we have, as  $n \rightarrow \infty$ ,

$$h(z) - \bar{h}(z) \rightarrow 0$$

almost surely for all  $z$  not an eigenvalue of  $\frac{1}{n}\mathbf{X}\mathbf{X}^\top$ . Therefore, there exists a probability one set  $\Omega_z$  on which  $h(z)$  is uniformly bounded for all large  $n$ , with a bound independent of  $z$ . Then by the Theorem of “no eigenvalues outside the support” (see for example (Bai & Silverstein, 1998)) we know that, with probability one, for all  $n, p$  large, no eigenvalue of  $\frac{1}{n}\mathbf{Z}\mathbf{Z}^\top$  appears outside the interval  $[\lambda_-, \lambda_+]$ , where we recall  $\lambda_- \equiv (1 - \sqrt{c})^2$  and  $\lambda_+ \equiv (1 + \sqrt{c})^2$ . As such, the set of intersection  $\Omega = \cap_{z_i} \Omega_{z_i}$  for a finitely many  $z_i$ , is still a probability one set. Finally by Vitali convergence theorem, together with the analyticity of the function under consideration, we conclude the proof of Theorem 1. The proof of Theorem 2 follows exactly the same line of arguments and is thus omitted here.  $\square$

## A.2. Detailed Derivation of (4)-(7)

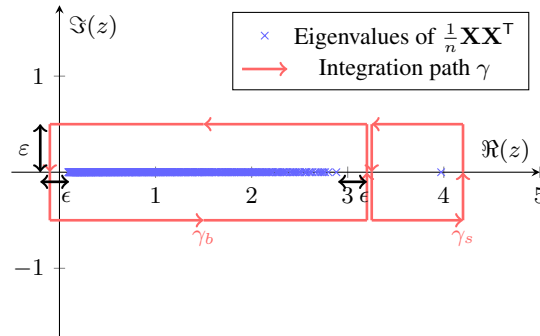

Figure 7. Eigenvalue distribution of  $\frac{1}{n}\mathbf{X}\mathbf{X}^\top$  for  $\boldsymbol{\mu} = [1.5; \mathbf{0}_{p-1}]$ ,  $p = 512$ ,  $n = 1024$  and  $c_1 = c_2 = 1/2$ .

We first determine the location of the isolated eigenvalue  $\lambda$  (as shown in Figure 2). More concretely, we would like to find  $\lambda$  an eigenvalue of  $\frac{1}{n}\mathbf{X}\mathbf{X}^\top$  that lies outside the support of Marčenko–Pastur distribution (in fact, not an eigenvalue of  $\frac{1}{n}\mathbf{Z}\mathbf{Z}^\top$ ).

Solving the following equation for  $\lambda \in \mathbb{R}$ ,

$$\begin{aligned}
 & \det\left(\frac{1}{n}\mathbf{X}\mathbf{X}^\top - \lambda\mathbf{I}_p\right) = 0 \\
 & \Leftrightarrow \det\left(\frac{1}{n}\mathbf{Z}\mathbf{Z}^\top - \lambda\mathbf{I}_p + [\boldsymbol{\mu} \quad \frac{1}{n}\mathbf{Z}\mathbf{y}] \begin{bmatrix} 1 & 1 \\ 1 & 0 \end{bmatrix} \begin{bmatrix} \boldsymbol{\mu}^\top \\ \frac{1}{n}\mathbf{y}^\top\mathbf{Z}^\top \end{bmatrix}\right) = 0 \\
 & \Leftrightarrow \det\left(\frac{1}{n}\mathbf{Z}\mathbf{Z}^\top - \lambda\mathbf{I}_p\right) \det\left(\mathbf{I}_p + \mathbf{Q}(\lambda) [\boldsymbol{\mu} \quad \frac{1}{n}\mathbf{Z}\mathbf{y}] \begin{bmatrix} 1 & 1 \\ 1 & 0 \end{bmatrix} \begin{bmatrix} \boldsymbol{\mu}^\top \\ \frac{1}{n}\mathbf{y}^\top\mathbf{Z}^\top \end{bmatrix}\right) = 0 \\
 & \Leftrightarrow \det\left(\mathbf{I}_2 + \begin{bmatrix} 1 & 1 \\ 1 & 0 \end{bmatrix} \begin{bmatrix} \boldsymbol{\mu}^\top \\ \frac{1}{n}\mathbf{y}^\top\mathbf{Z}^\top \end{bmatrix} \mathbf{Q}(\lambda) [\boldsymbol{\mu} \quad \frac{1}{n}\mathbf{Z}\mathbf{y}]\right) = 0 \\
 & \Leftrightarrow \det\begin{bmatrix} \|\boldsymbol{\mu}\|^2 m(\lambda) + 1 & 1 + z\tilde{m}(\lambda) \\ \|\boldsymbol{\mu}\|^2 m(\lambda) & 1 \end{bmatrix} + o(1) = 0 \\
 & \Leftrightarrow 1 + (\|\boldsymbol{\mu}\|^2 + c)m(\lambda) + o(1) = 0
 \end{aligned}$$

where we recall the definition  $\mathbf{Q}(\lambda) \equiv (\frac{1}{n}\mathbf{Z}\mathbf{Z}^\top - \lambda\mathbf{I}_p)^{-1}$  and use the fact that  $\det(\mathbf{A}\mathbf{B}) = \det(\mathbf{A})\det(\mathbf{B})$  as well as the Sylvester's determinant identity  $\det(\mathbf{I}_p + \mathbf{A}\mathbf{B}) = \det(\mathbf{I}_n + \mathbf{B}\mathbf{A})$  for  $\mathbf{A}, \mathbf{B}$  of appropriate dimension. Together with (2) we deduce the (empirical) isolated eigenvalue  $\lambda = \lambda_s + o(1)$  with

$$\lambda_s = c + 1 + \|\boldsymbol{\mu}\|^2 + \frac{c}{\|\boldsymbol{\mu}\|^2}$$

which in fact gives the asymptotic location of the isolated eigenvalue as  $n \rightarrow \infty$ . In the following, we may thus use  $\lambda_s$  instead of  $\lambda$  throughout the computation. By splitting the path  $\gamma$  into  $\gamma_b + \gamma_s$  that circles respectively around the main bulk between  $[\lambda_-, \lambda_+]$  and the isolated eigenvalue  $\lambda_s$ , we easily deduce, with the residual theorem that  $E = E_{\gamma_b} + E_{\gamma_s}$  with

$$\begin{aligned}
 E_{\gamma_s} &= -\frac{1}{2\pi i} \oint_{\gamma_s} \frac{1 - f_t(z)}{z} \frac{\|\boldsymbol{\mu}\|^2 m(z)}{1 + (\|\boldsymbol{\mu}\|^2 + c)m(z)} dz = -\text{Res} \frac{1 - f_t(z)}{z} \frac{\|\boldsymbol{\mu}\|^2 m(z)}{1 + (\|\boldsymbol{\mu}\|^2 + c)m(z)} \\
 &= -\lim_{z \rightarrow \lambda_s} (z - \lambda_s) \frac{1 - f_t(z)}{z} \frac{\|\boldsymbol{\mu}\|^2 m(z)}{1 + (\|\boldsymbol{\mu}\|^2 + c)m(z)} = -\frac{1 - f_t(\lambda_s)}{\lambda_s} \frac{\|\boldsymbol{\mu}\|^2 m(\lambda_s)}{(\|\boldsymbol{\mu}\|^2 + c)m'(\lambda_s)} \\
 &= -\frac{\|\boldsymbol{\mu}\|^2}{\|\boldsymbol{\mu}\|^2 + c} \frac{1 - f_t(\lambda_s)}{\lambda_s} \frac{1 - c - \lambda_s - 2c\lambda_s m(\lambda_s)}{cm(\lambda_s) + 1} = \left(\|\boldsymbol{\mu}\|^2 - \frac{c}{\|\boldsymbol{\mu}\|^2}\right) \frac{1 - f_t(\lambda_s)}{\lambda_s} \tag{11}
 \end{aligned}$$

with  $m'(z)$  the derivative of  $m(z)$  with respect to  $z$  and is obtained by taking the derivative of (2).

We now move on to handle the contour integration  $\gamma_b$  in the computation of  $E_{\gamma_b}$ . We follow the idea in (Bai & Silverstein, 2008) and choose the contour  $\gamma_b$  to be a rectangle with sides parallel to the axes, intersecting the real axis at 0 and  $\lambda_+$  (in fact at  $-\epsilon$  and  $\lambda_+ + \epsilon$  so that the functions under consideration remain analytic) and the horizontal sides being a distance  $\epsilon \rightarrow 0$  away from the real axis. Since for nonzero  $x \in \mathbb{R}$ , the limit  $\lim_{z \in \mathbb{Z} \rightarrow x} m(z) \equiv \tilde{m}(x)$  exists (Silverstein & Choi, 1995) and is given by

$$\tilde{m}(x) = \frac{1 - c - x}{2cx} \pm \frac{i}{2cx} \sqrt{4cx - (1 - c - x)^2} = \frac{1 - c - x}{2cx} \pm \frac{i}{2cx} \sqrt{(x - \lambda_-)(\lambda_+ - x)}$$

with the branch of  $\pm$  is determined by the imaginary part of  $z$  such that  $\Im(z) \cdot \Im m(z) > 0$  and we recall  $\lambda_- \equiv (1 - \sqrt{c})^2$  and  $\lambda_+ \equiv (1 + \sqrt{c})^2$ . For simplicity we denote

$$\Re \tilde{m} = \frac{1 - c - x}{2cx}, \quad \Im \tilde{m} = \frac{1}{2cx} \sqrt{(x - \lambda_-)(\lambda_+ - x)}$$

and therefore

$$\begin{aligned}
 E_{\gamma_b} &= -\frac{1}{2\pi i} \oint_{\gamma_b} \frac{1 - f_t(z)}{z} \frac{\|\boldsymbol{\mu}\|^2 m(z)}{1 + (\|\boldsymbol{\mu}\|^2 + c)m(z)} dz \\
 &= -\frac{\|\boldsymbol{\mu}\|^2}{\pi i} \int_{\lambda_-}^{\lambda_+} \frac{1 - f_t(x)}{x} \Im \left[ \frac{\Re \tilde{m} - i\Im \tilde{m}}{1 + (\|\boldsymbol{\mu}\|^2 + c)(\Re \tilde{m} - i\Im \tilde{m})} \right] dx \\
 &= -\frac{\|\boldsymbol{\mu}\|^2}{\pi i} \int_{\lambda_-}^{\lambda_+} \frac{1 - f_t(x)}{x} \Im \left[ \frac{\Re \tilde{m} + \frac{\|\boldsymbol{\mu}\|^2 + c}{cx} - i\Im \tilde{m}}{1 + 2(\|\boldsymbol{\mu}\|^2 + c)\Re \tilde{m} + \frac{(\|\boldsymbol{\mu}\|^2 + c)^2}{cx}} \right] dx
 \end{aligned}$$

with  $z = x \pm i\varepsilon$  and  $\varepsilon \rightarrow 0$  (on different sides of the real axis) and the fact that  $(\Re\check{m})^2 + (\Im\check{m})^2 = \frac{1}{cx}$ . We take the imaginary part and result in

$$E_{\gamma_b} = \frac{\|\boldsymbol{\mu}\|^2}{\pi} \int_{\lambda_-}^{\lambda_+} \frac{1 - f_t(x)}{x} \frac{\Im\check{m}}{1 + 2(\|\boldsymbol{\mu}\|^2 + c)\Re\check{m} + \frac{(\|\boldsymbol{\mu}\|^2 + c)^2}{cx}} dx = \frac{1}{2\pi} \int_{\lambda_-}^{\lambda_+} \frac{1 - f_t(x)}{x} \frac{\sqrt{4cx - (1 - c - x)^2}}{\lambda_s - x} dx \quad (12)$$

where we recall the definition  $\lambda_s \equiv c + 1 + \|\boldsymbol{\mu}\|^2 + \frac{c}{\|\boldsymbol{\mu}\|^2}$ . Ultimately we assemble (11) and (12) to get the expression in (4). The derivations of (5)-(7) follow the same arguments and are thus omitted here.
